# Supplementary material for: Generation of α-1,3-galactosyltransferase knocked-out transgenic cloned pigs with knocked-in five human genes
Source: PubMed Central journal article supplement (PMC5243873; doi:10.1007/s11248-016-9979-8), 2016-08-23
Supplement: 11248_2016_9979_MOESM2_ESM.pdf [file 11248_2016_9979_MOESM2_ESM.pdf]

Table 1. PCR primers

| Regions          | Sense primer                   | Antisense primer                           |
|------------------|--------------------------------|--------------------------------------------|
| ICAM2 promoter   | ctcgagttcgggagactggatgatcatgat | gtcgaccttgagtggcaccacgggct ggcaggaaa       |
| hCD55            | agatatcgcgcccggagcgtgcccgcgg   | acctaggtctcttagcacgagtcagcaa gcccatggttac  |
| hCD39            | atacgtacaagaaggagtctaactgaaga  | aactagttctcttagctcgtaccatatac ttccagaaatat |
| hTFPI            | accgggacaatgaagaaagtacatgcac   | acctaggtctcttagctcgacataggca tgaatgctatcc  |
| hC1 inhibitor    | aaggcctgcctccaggctgacctgctg    | agctagctctcttagctcgggccctggg gtcataactcg   |
| hTNFAIP3         | atcgcgacaagtccttctcaggctttg    | agtcgacttagccatacatctgcttgaa               |
| 5' $\alpha$ -Gal | gcggccgcggtgttgctgtggctgtggca  | ctcgagatccaccatgatgtaaaagatg               |
| 3' $\alpha$ -Gal | gtcgaccaacaaccactaaaat cta     | ggcgcgccctccatgccctgtgtctcttag             |

Table 2. PCR primers for confirmation of cell line

| Regions       | Sense primer             | Antisense primer         | Tm(°C) |
|---------------|--------------------------|--------------------------|--------|
| TG            | gagcatgccaggatgacaaggta  | tgccacctggtacatcaatctgac | 55     |
| 5' KI         | tgctcagtgggtaaaggatcaag  | catccctggaacagtgcgcaggt  | 65     |
| 3' KI         | attgagatgcatgctttgcatact | ttctaagacagtgctgctctagtt | 50     |
| Pig GAPDH     | cctccactacatggtctacat    | tcatgagtccctccacgatg     | 57     |
| hCD55         | agatgtacctaatgccagcc     | ccacctggtacatcaatctga    | 58     |
| hCD39         | ccaggatcattactggccaag    | aggtcacttacgttactacc     | 58     |
| hTFPI         | cggagttgccaccactgaaac    | ttcataattatccacctgga     | 55     |
| hC1 inhibitor | gcaacaacagtgacgccaact    | tgggctggaacttgacatct     | 59     |
| hTNFAIP3      | ggaccatggcacaactcatct    | ttcatggcagtggtctcactg    | 58     |
